# Supplementary material for: Exploring Olfactory–Oral Cross-Modal Interactions through Sensory and Chemical Characteristics of Italian Red Wines
Source: MDPI journal article supplement (doi:10.3390/foods9111530), 2020-10-24
Supplement: s1 [file s1]

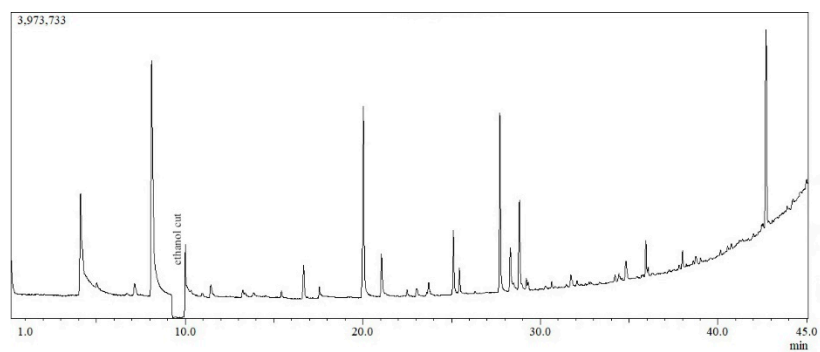

(a)

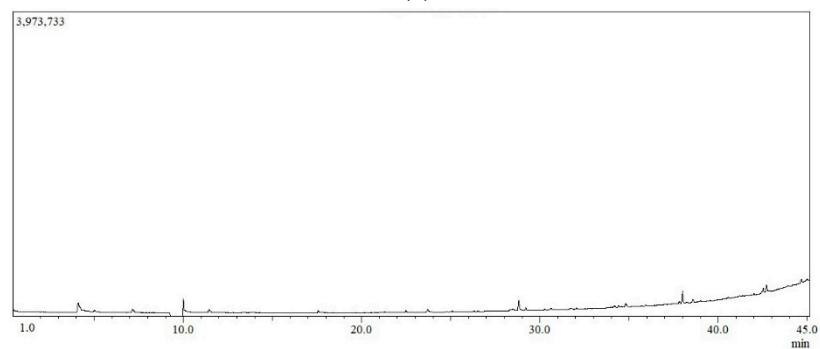

(b)

**Figure 1s.** SPME/GC-MS chromatograms (TIC) of a WW sample (a) compared to the corresponding DW (b).
